# Supplementary material for: Structural basis of ubiquitin recognition by the winged-helix domain of Cockayne syndrome group B protein
Source: PubMed Central journal article supplement — Nucleic Acids Res. 2019 Feb 11;47(7):3784–94. doi: 10.1093/nar/gkz081 (PMC6468306; doi:10.1093/nar/gkz081), 2019-02-11
Supplement: gkz081_supplemental_file.pdf [file gkz081_supplemental_file.pdf]

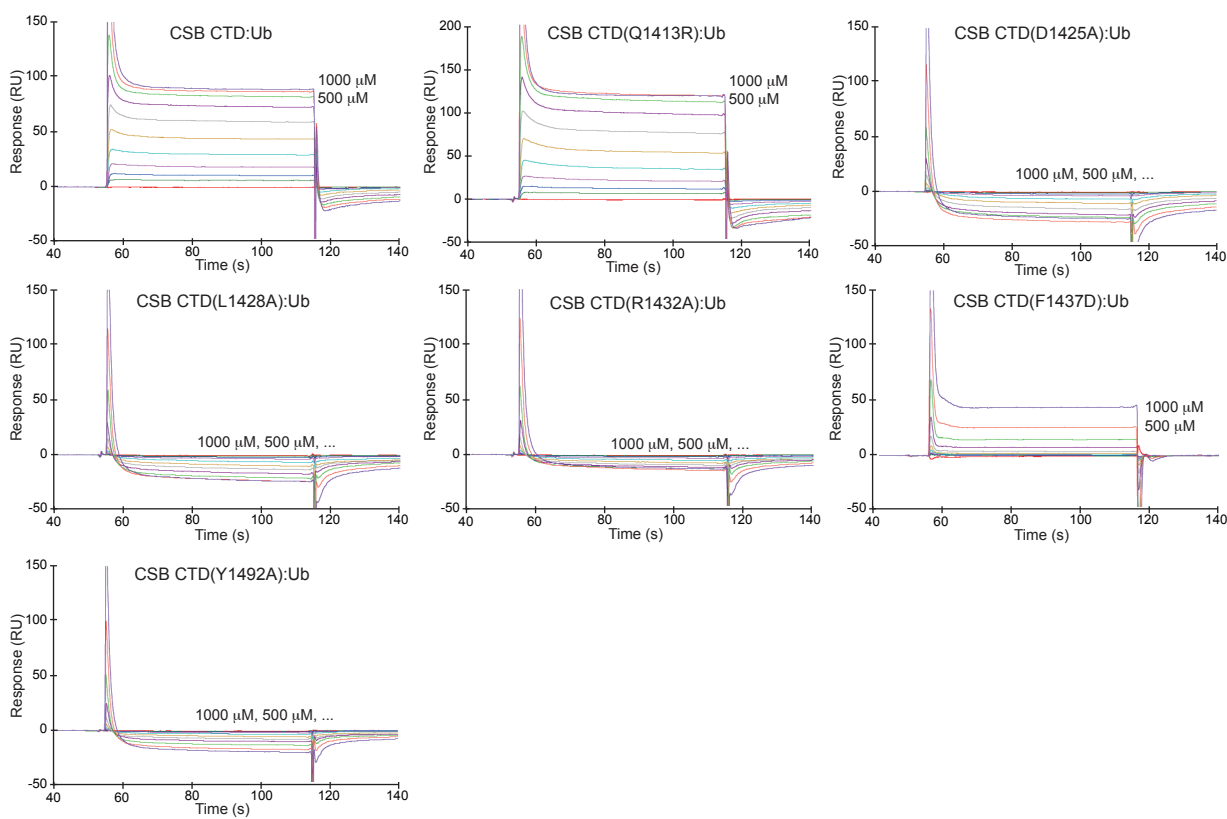

**Supplementary Figure 1 SPR sensorgrams that were used to calculate the affinities shown in Table 2.**

One representative sensorgram from three independent measurements is shown for each ligand–analyte pair.

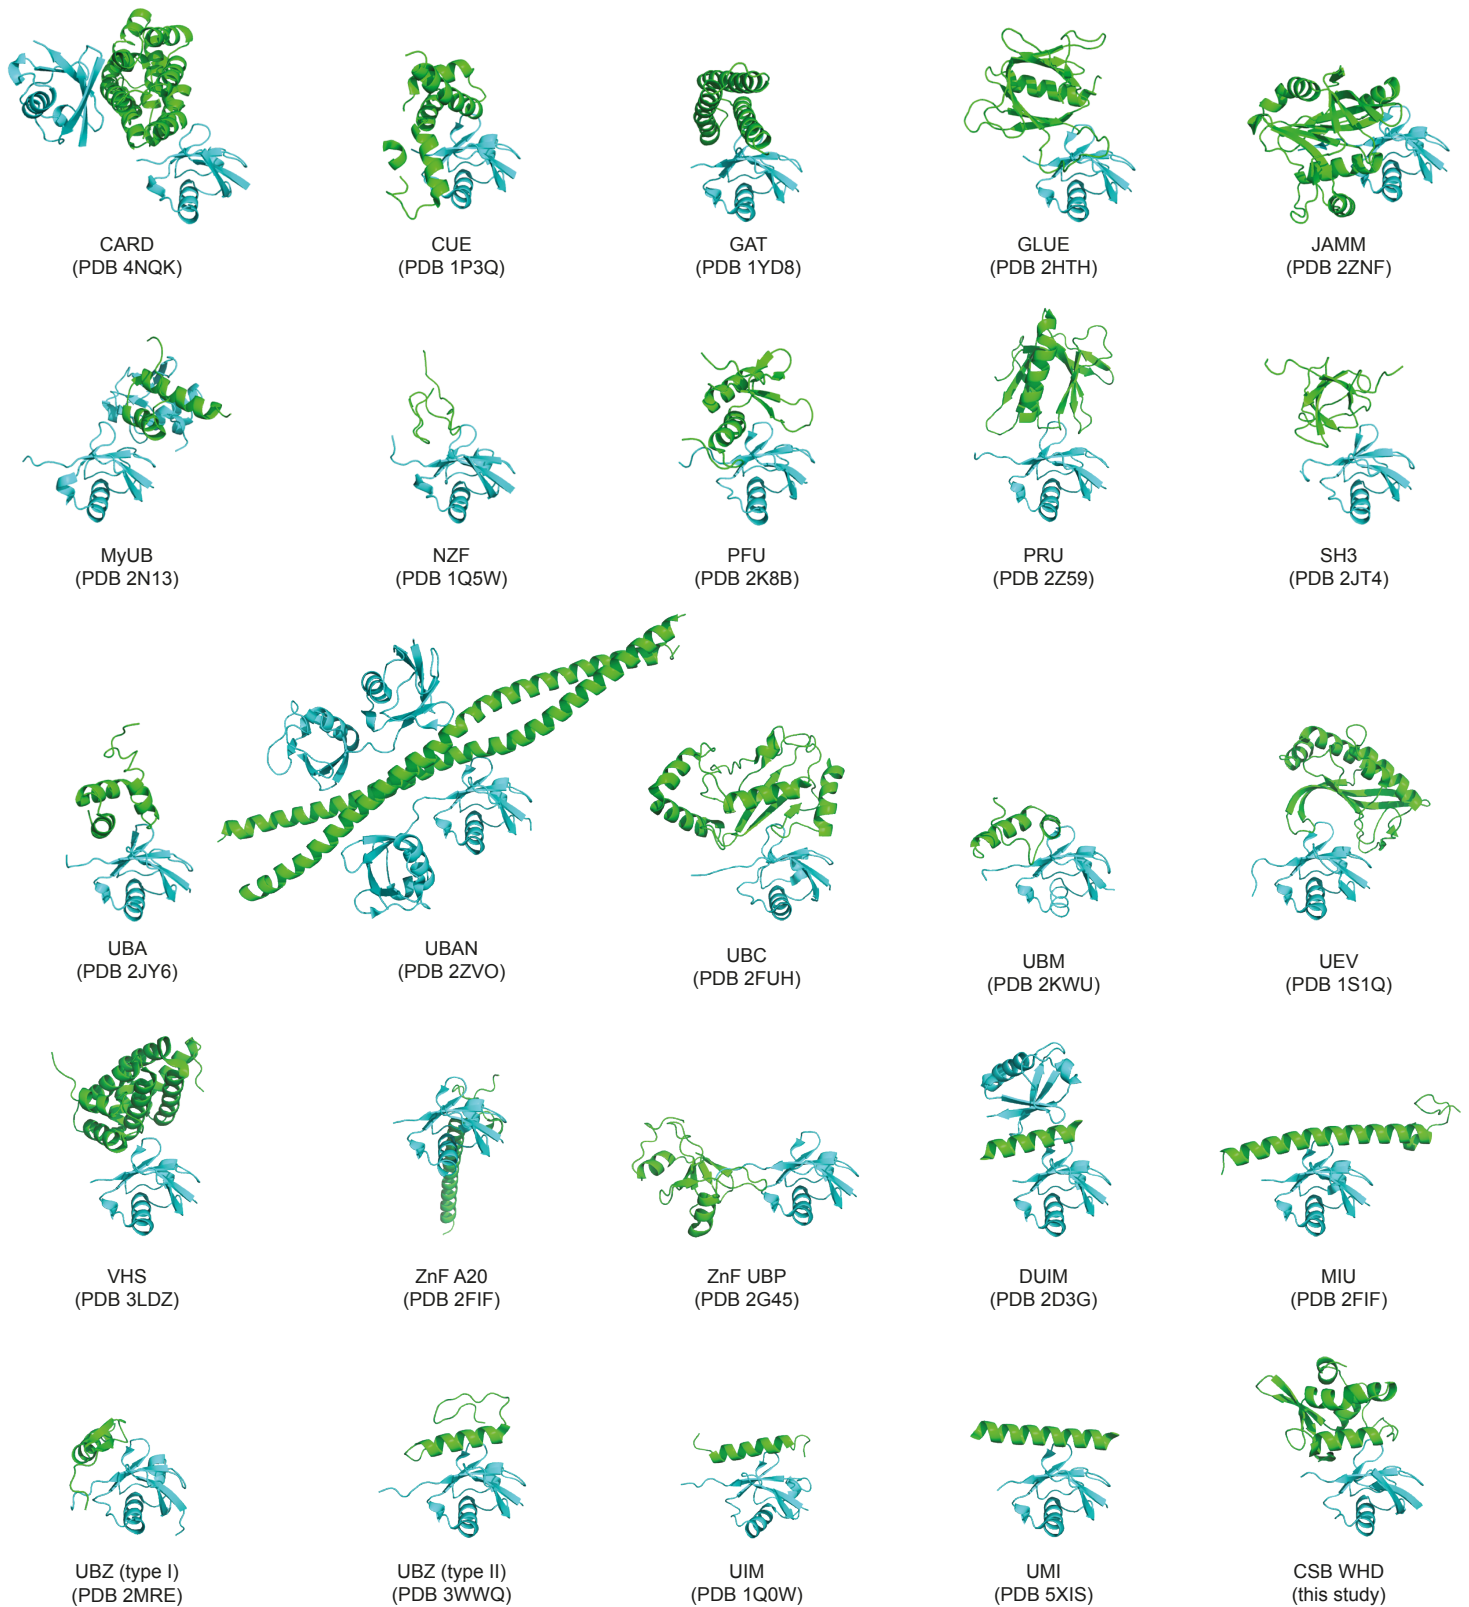

### Supplementary Figure 2 UBDs of known structures.

UBDs and the bound Ub molecules are colored green and cyan, respectively. JAMM is used as a UBD in Prp8. The Prp8 JAMM structure has been reported only in the ubiquitin-free form. Therefore, the ubiquitin-bound JAMM structure of the AMSH-LP deubiquitinating enzyme is shown in this figure.
